# Supplementary material for: E2-EPF UCP targets pVHL for degradation and associates with tumor growth and metastasis
Source: Springer Nature journal article supplement (doi:10.1038/nm1440), 2006-07-01
Supplement: nm1440-S6.pdf [file nm1440-S6.pdf]

Ck-K1 cholangiocarcinoma cell line

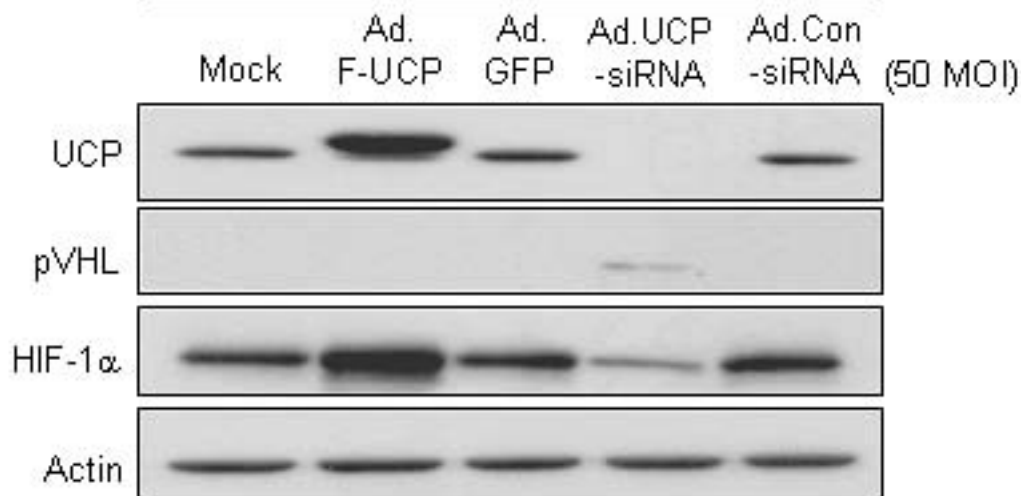

**Supplementary Figure 6** UCP targets pVHL for degradation in Ck-K1 cells, thereby stabilizing HIF-1 $\alpha$  under normoxia. Ck-K1 cholangiocarcinoma cells were transduced with the indicated viral vectors, incubated for 48 h, and immunoblotted as indicated.
